# Supplementary material for: Amnesia after Midazolam and Ketamine Sedation in Children: A Secondary Analysis of a Randomized Controlled Trial
Source: MDPI journal article supplement (doi:10.3390/jcm10225430), 2021-11-20
Supplement: s1 [file s1]

Table S1 - Characteristics of the children included in the qualitative analysis.

| Child ID | Sex    | Age (months) | Sedatives                         | Behavior | Sedation level |
|----------|--------|--------------|-----------------------------------|----------|----------------|
| C01      | Female | 61           | Oral midazolam                    | Negative | Minimal        |
| C02      | Male   | 73           | Intranasal midazolam and ketamine | Positive | Minimal        |
| C03      | Female | 60           | Intranasal midazolam and ketamine | Negative | Minimal        |
| C04      | Female | 52           | Oral midazolam and ketamine       | Positive | Minimal        |
| C05      | Female | 43           | Oral midazolam                    | Positive | Minimal        |
| C06      | Male   | 50           | Oral midazolam                    | Negative | Minimal        |
| C07      | Female | 43           | Oral midazolam                    | Positive | Moderate       |
| C08      | Female | 69           | Intranasal midazolam and ketamine | Positive | Moderate       |
| C09      | Female | 45           | Intranasal midazolam and ketamine | Positive | Moderate       |
| C10      | Male   | 50           | Intranasal midazolam and ketamine | Positive | Moderate       |
| C11      | Male   | 76           | Oral midazolam and ketamine       | Positive | Minimal        |
| C12      | Female | 62           | Oral midazolam and ketamine       | Negative | Moderate       |
| C13      | Male   | 45           | Oral midazolam and ketamine       | Positive | Moderate       |
| C14      | Female | 58           | Intranasal midazolam and ketamine | Positive | Moderate       |
| C15      | Male   | 60           | Intranasal midazolam and ketamine | Negative | Moderate       |
| C16      | Male   | 41           | Oral midazolam                    | Negative | Moderate       |
| C17      | Male   | 43           | Oral midazolam                    | Negative | Minimal        |
| C18      | Female | 60           | Oral midazolam and ketamine       | Positive | Moderate       |
| C19      | Male   | 49           | Oral midazolam and ketamine       | Positive | Moderate       |
| C20      | Female | 53           | Oral midazolam                    | Positive | Moderate       |
| C21      | Female | 42           | Oral midazolam                    | Positive | Minimal        |
| C22      | Female | 76           | Intranasal midazolam and ketamine | Negative | Moderate       |
| C23      | Female | 47           | Intranasal midazolam and ketamine | Positive | Moderate       |
| C24      | Female | 70           | Oral midazolam                    | Negative | Moderate       |
| C25      | Male   | 70           | Oral midazolam                    | Positive | Moderate       |
| C26      | Female | 43           | Oral midazolam                    | Positive | Moderate       |
| C27      | Female | 48           | Oral midazolam                    | Negative | Moderate       |
| C28      | Female | 53           | Intranasal midazolam and ketamine | Negative | Moderate       |
